# Supplementary material for: High Resolution Mapping of Bactericidal Monoclonal Antibody Binding Epitopes on Staphylococcus aureus Antigen MntC
Source: PubMed Central journal article supplement (PMC5045189; doi:10.1371/journal.ppat.1005908), 2016-09-30

# SUPPLEMENTARY FIGURE 1 (CONTINUED)

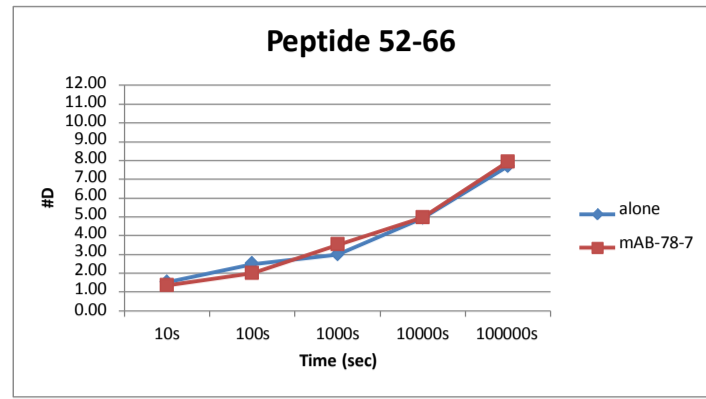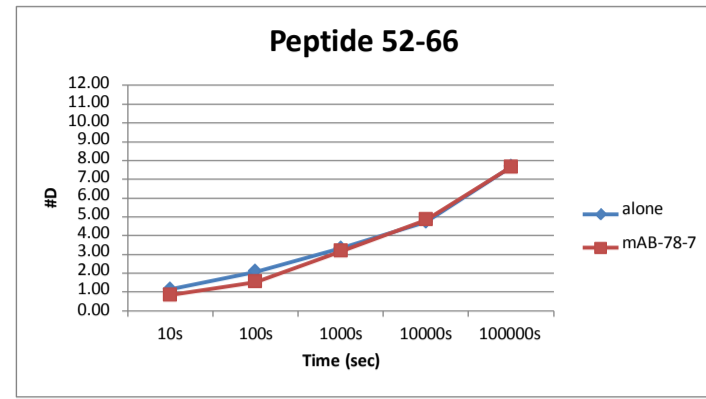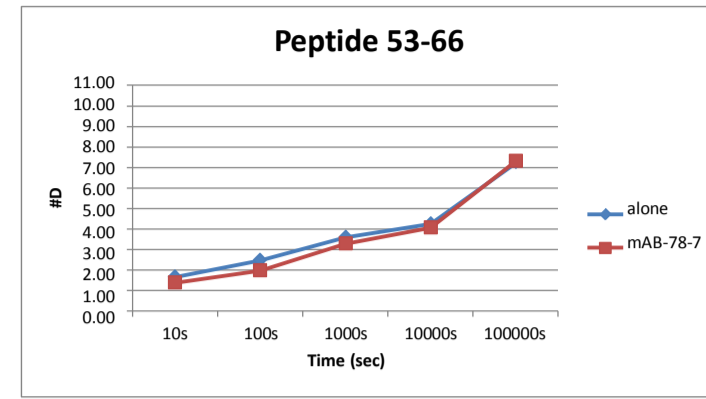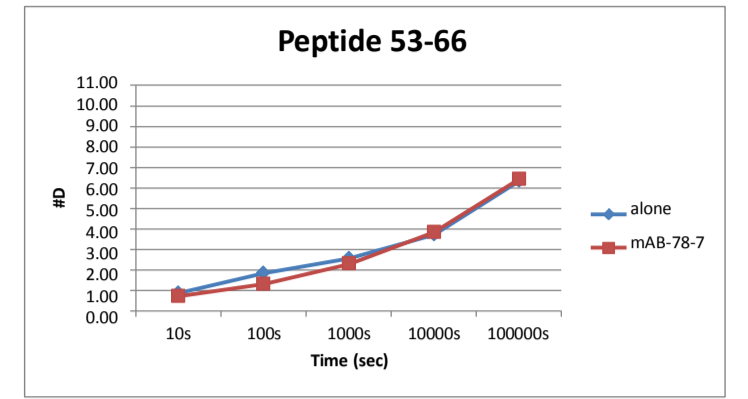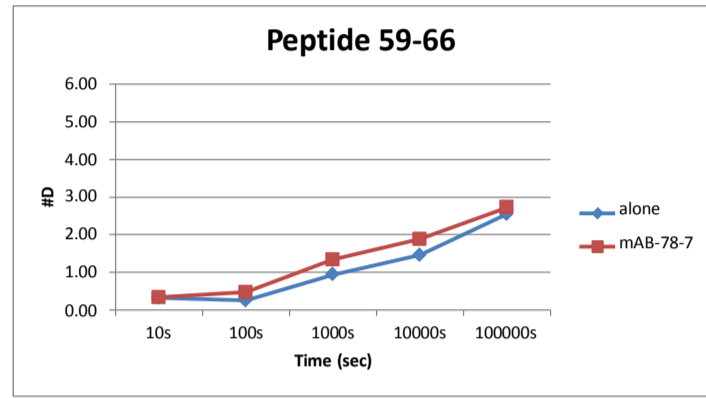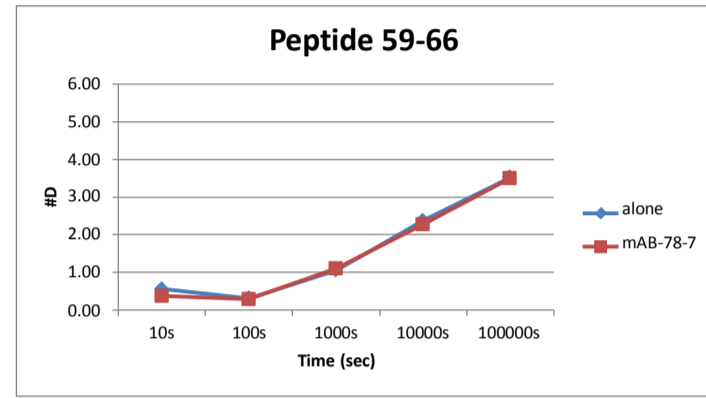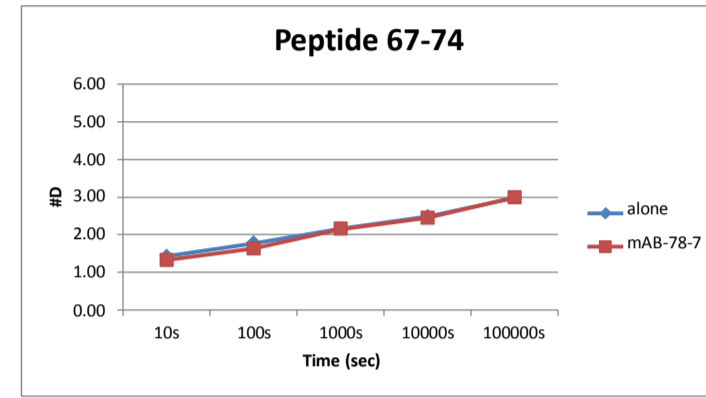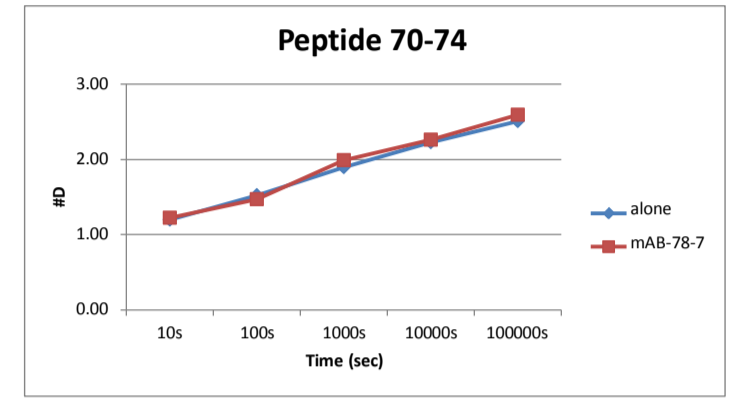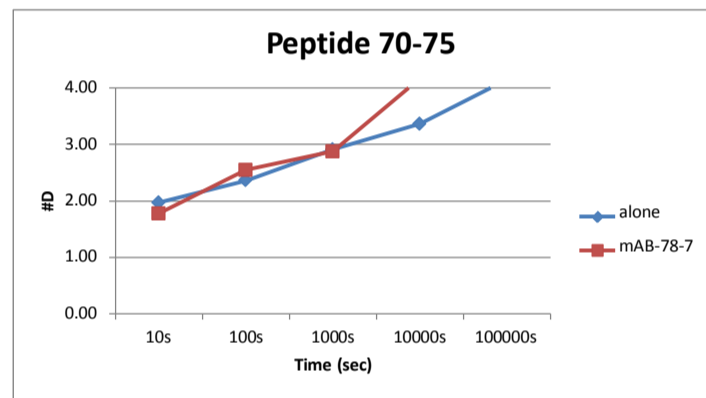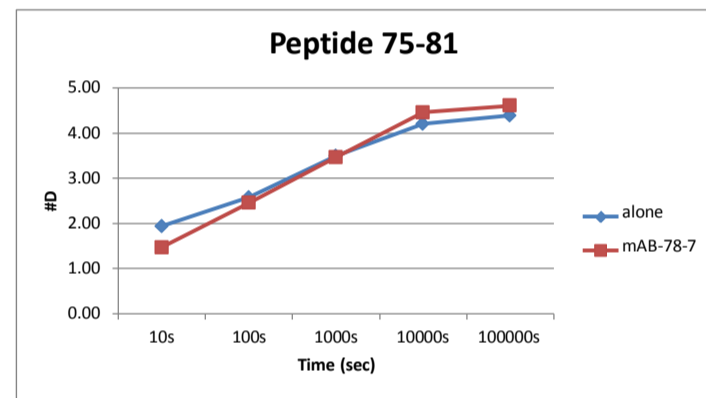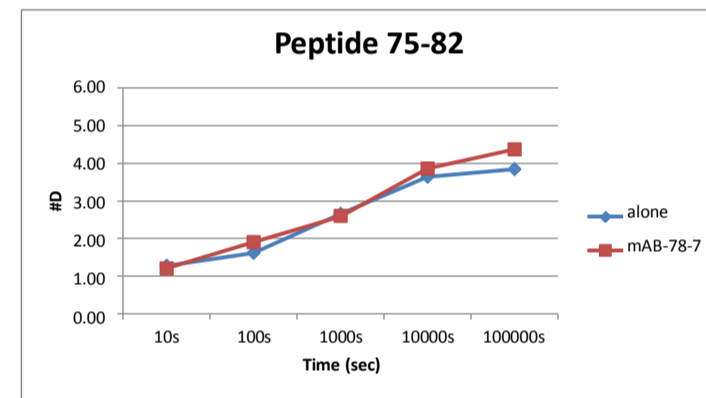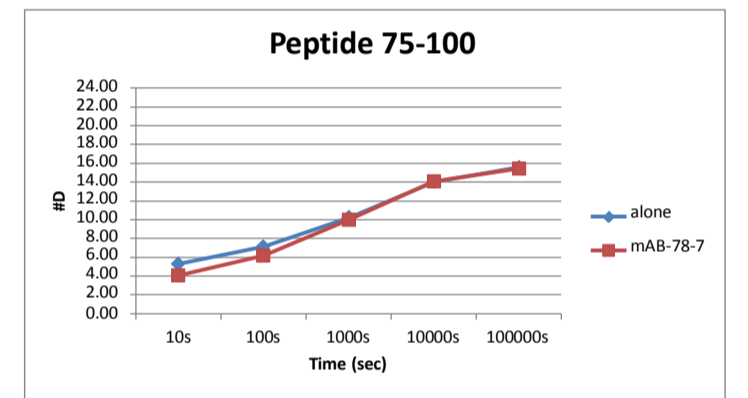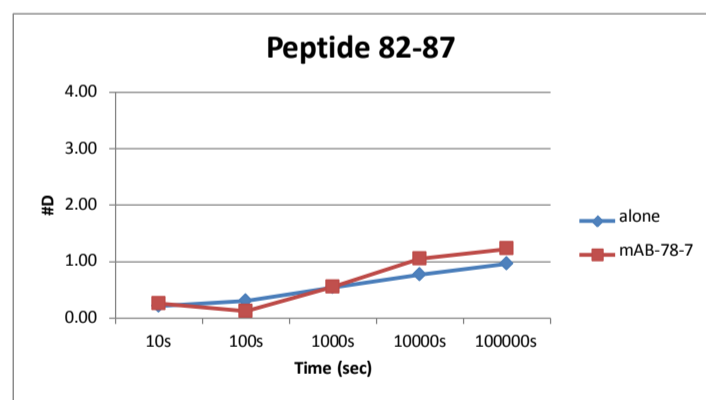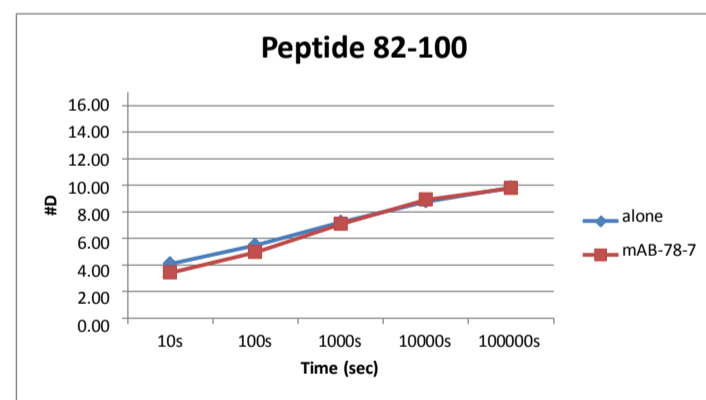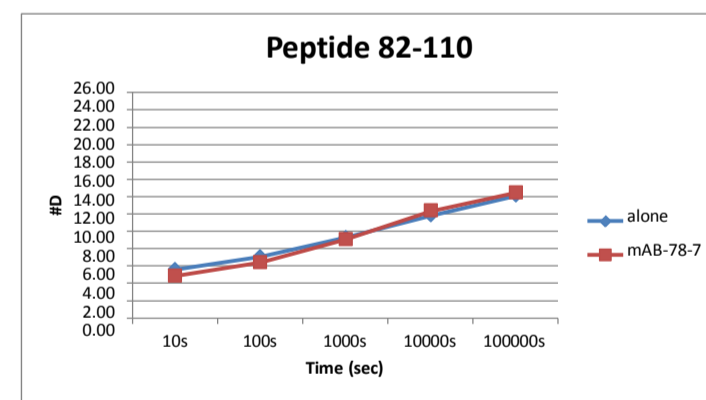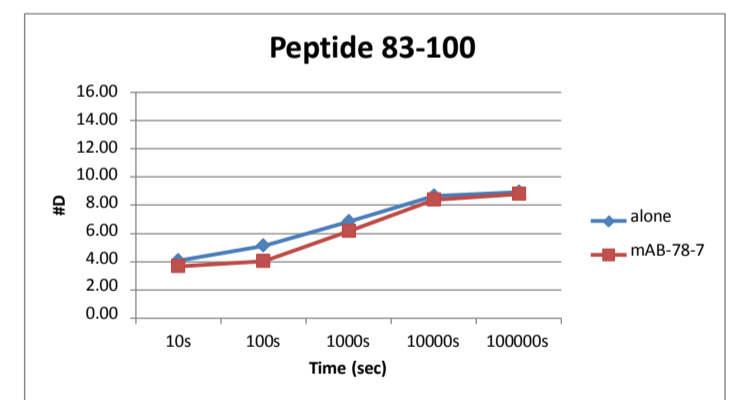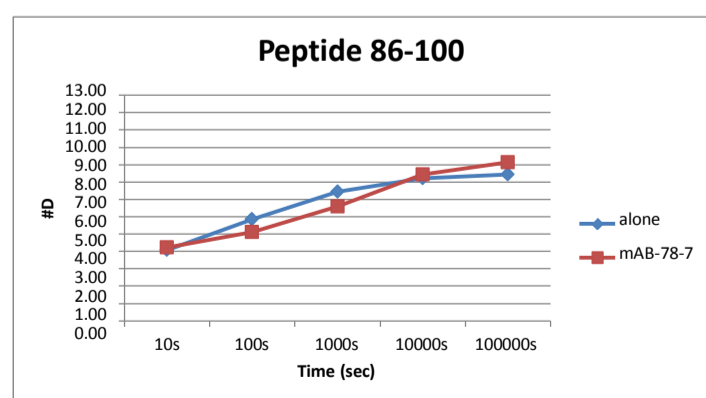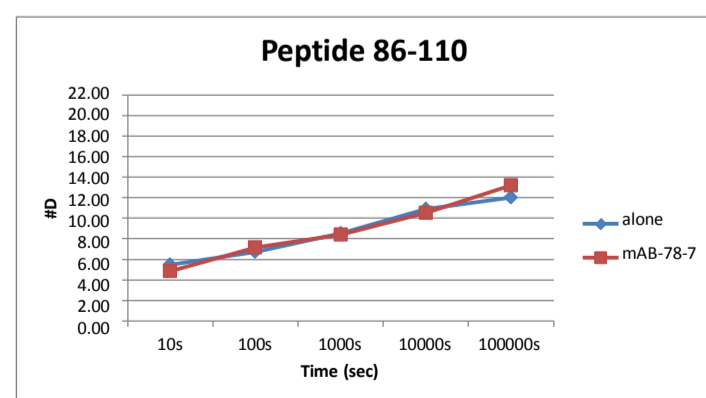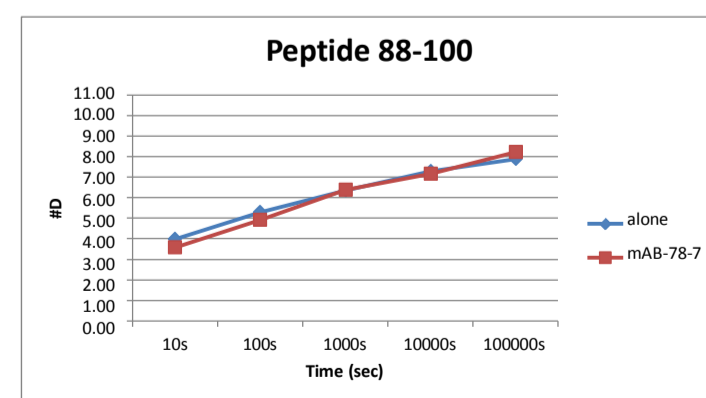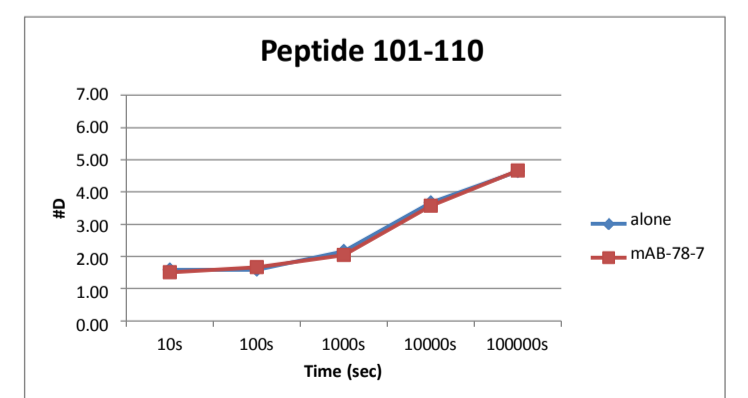

# SUPPLEMENTARY FIGURE 1 (CONTINUED)

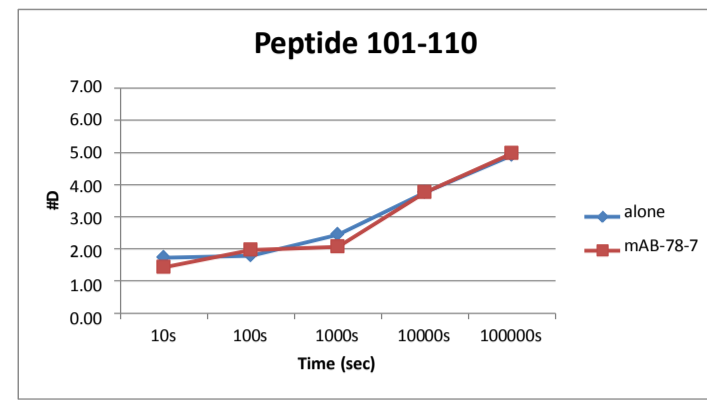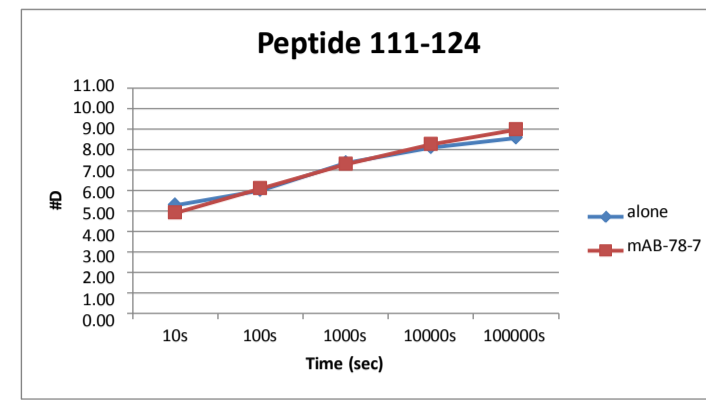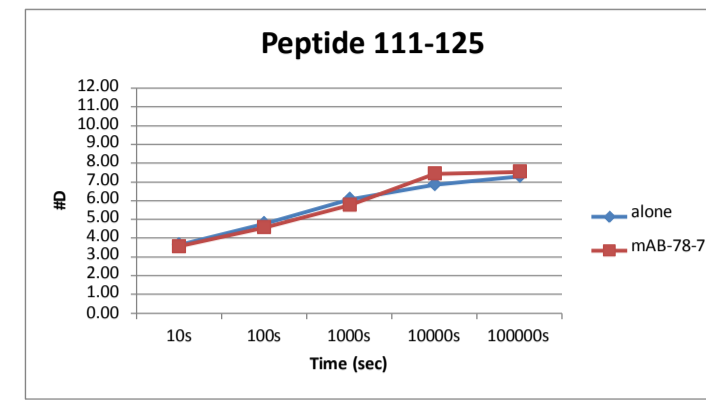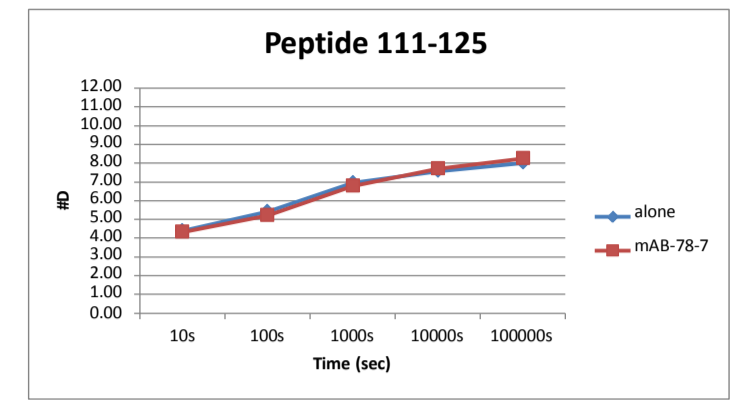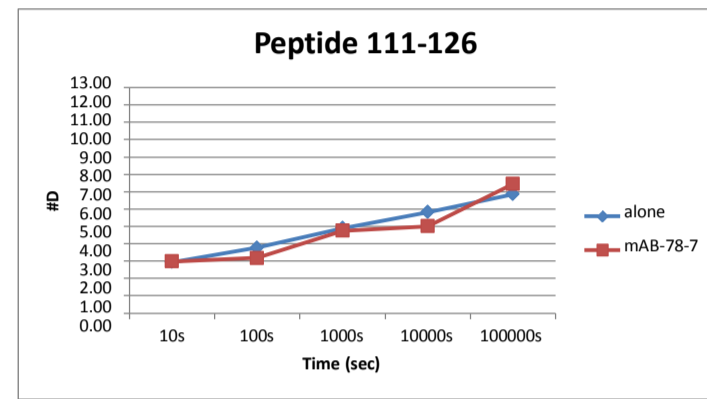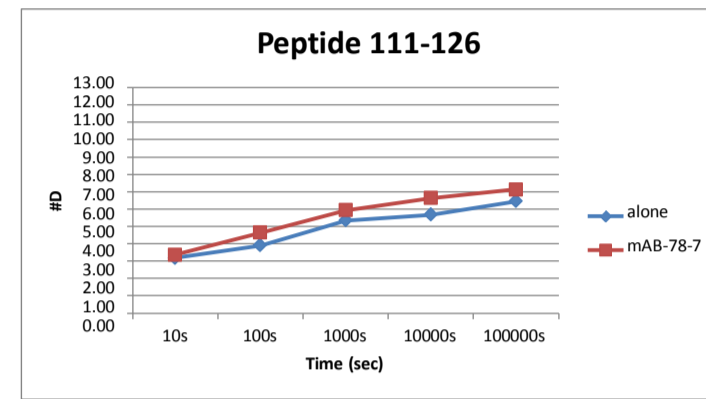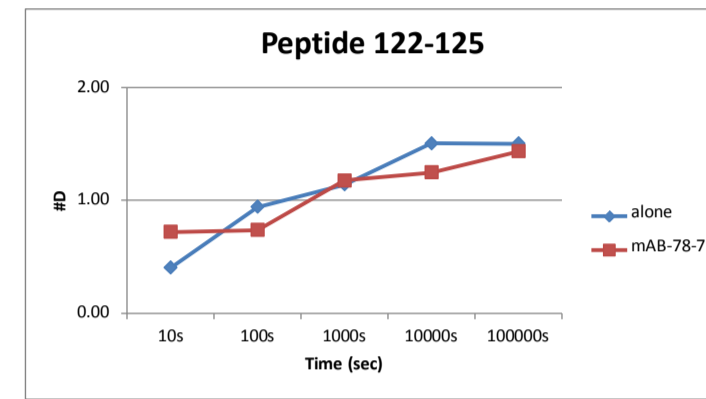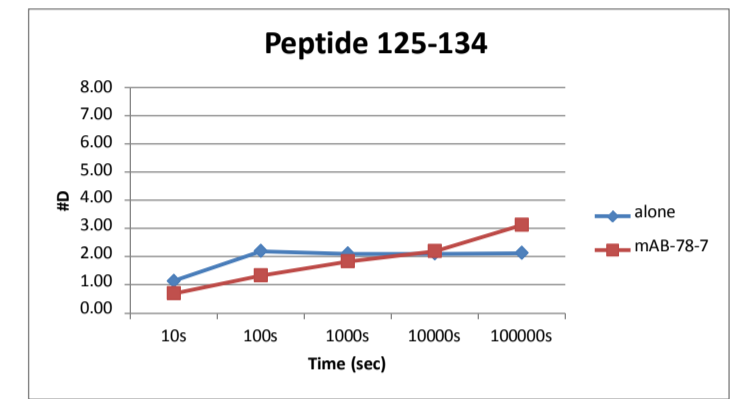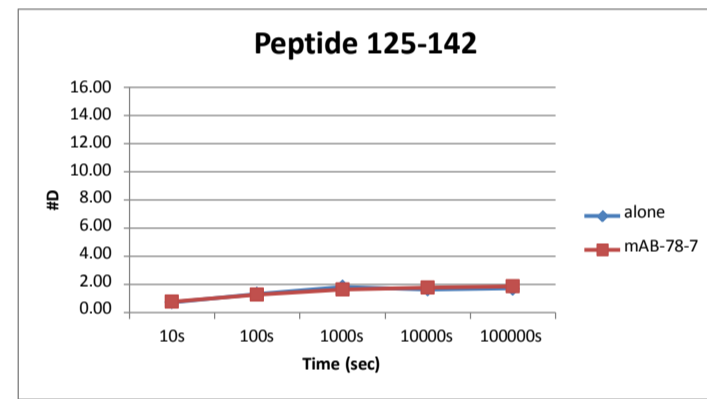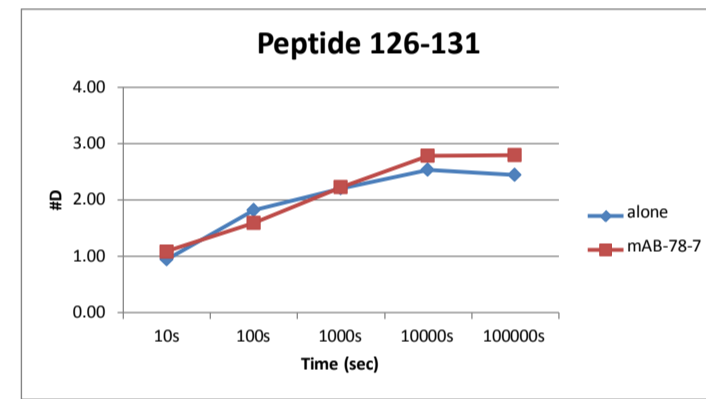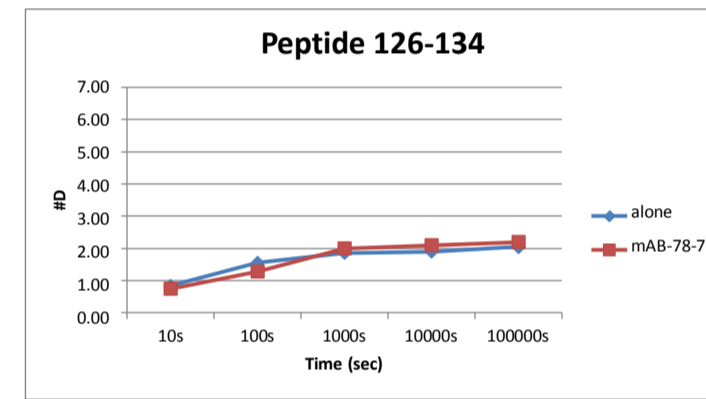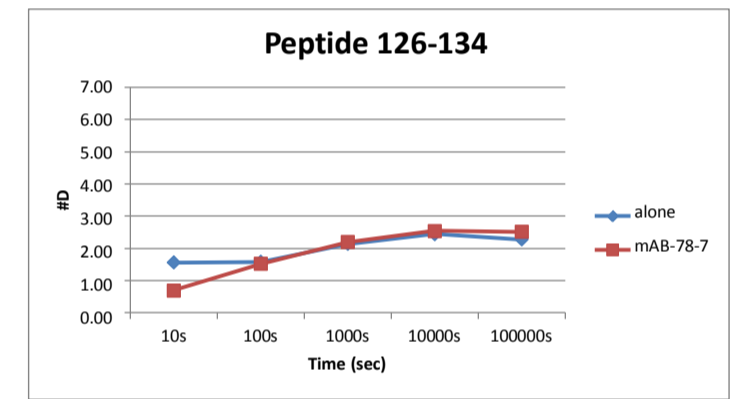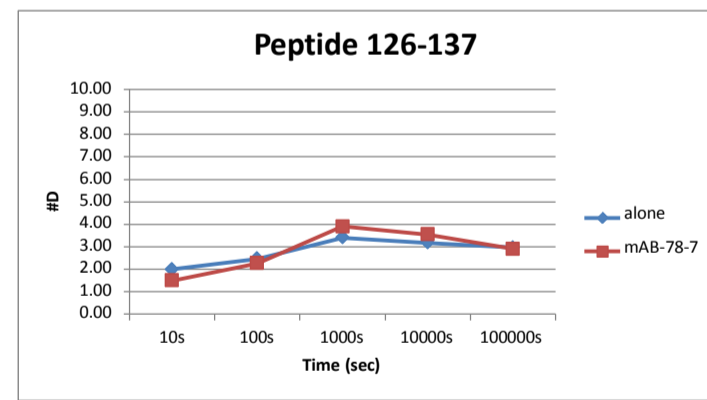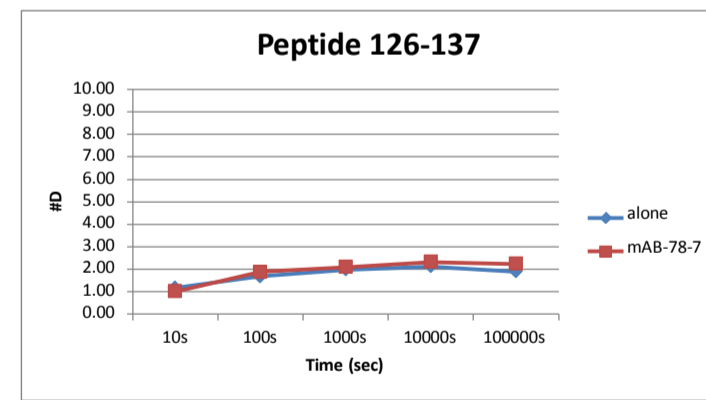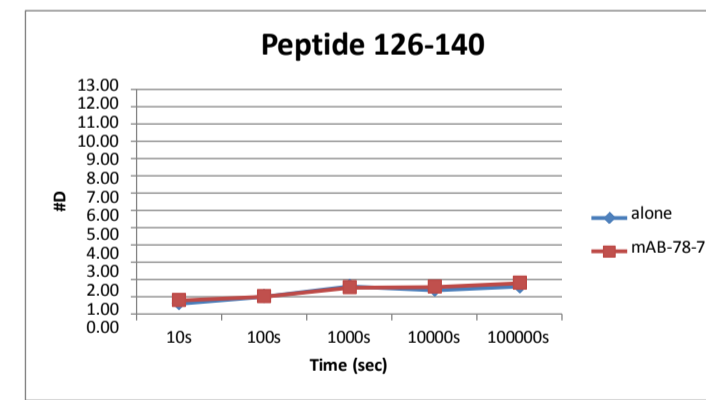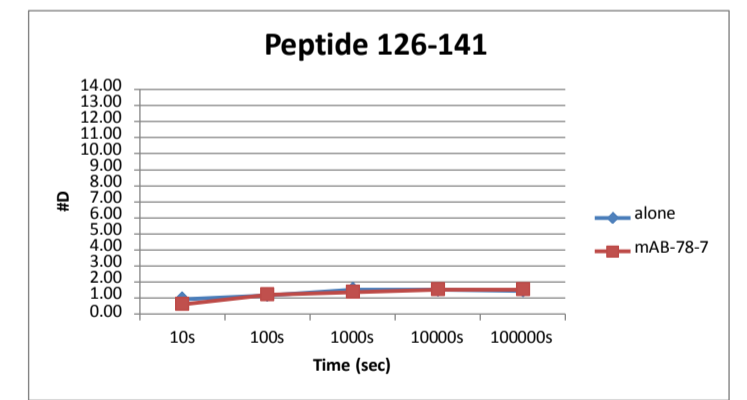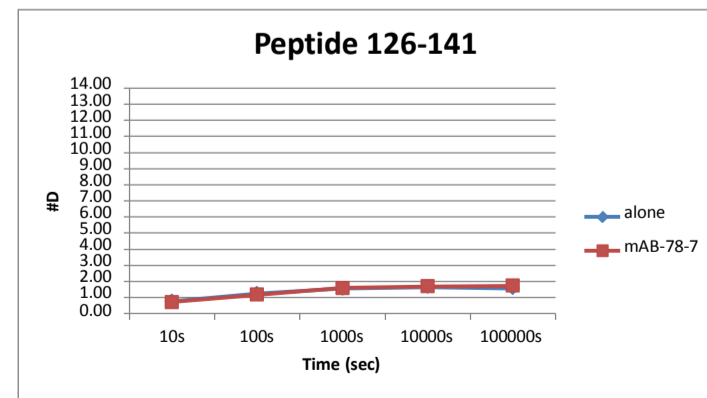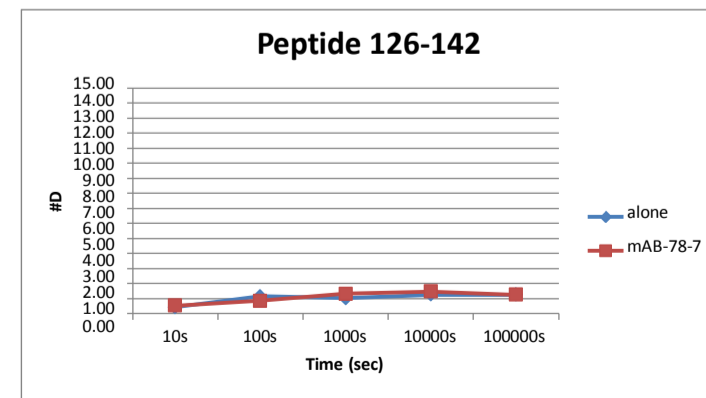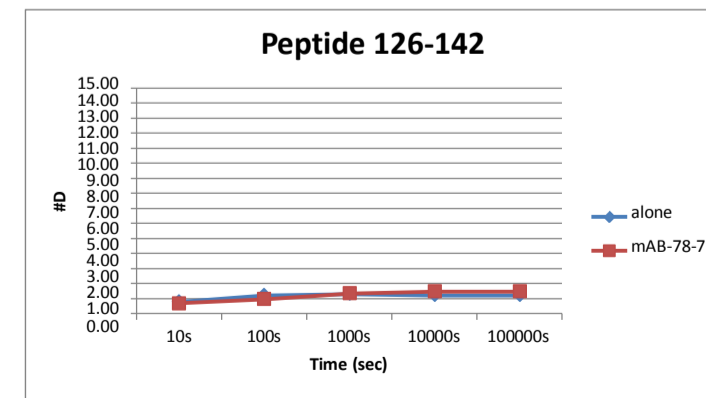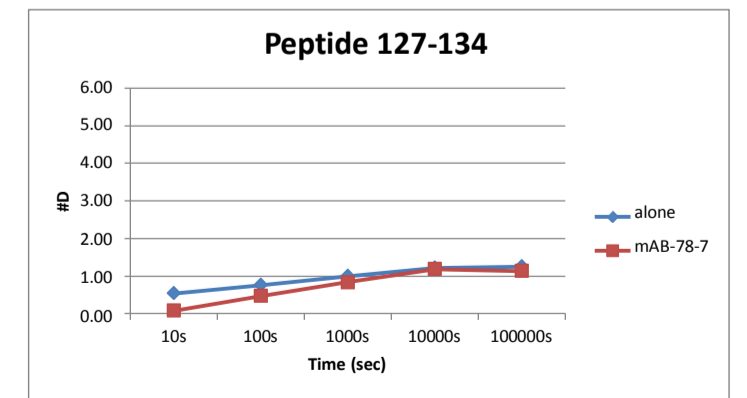

# SUPPLEMENTARY FIGURE 1 (CONTINUED)

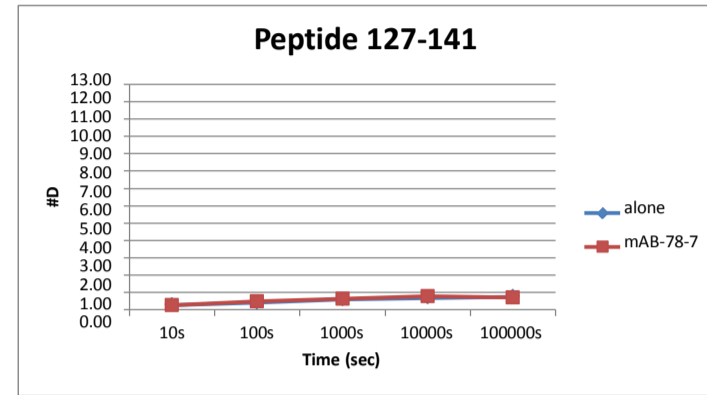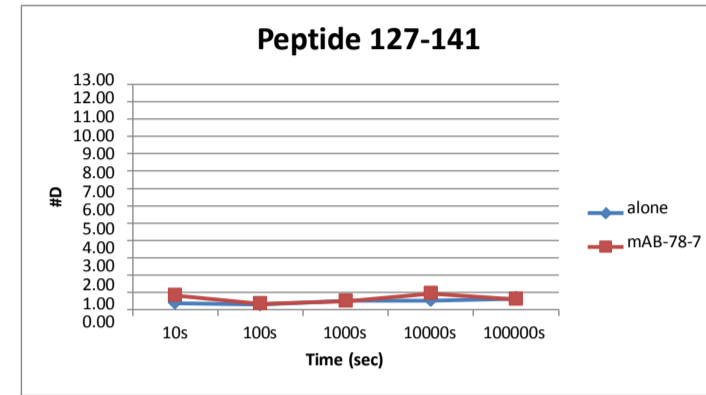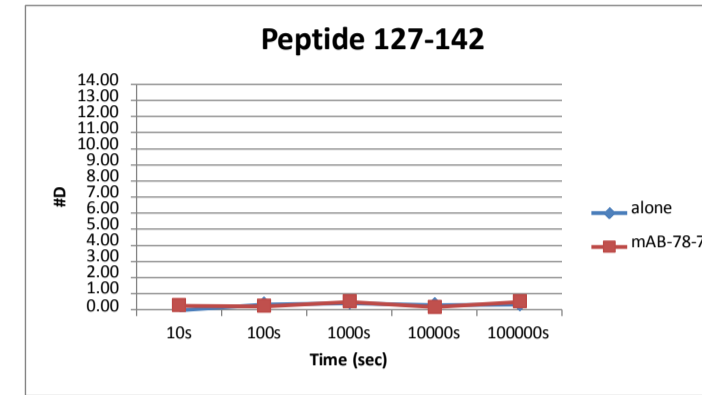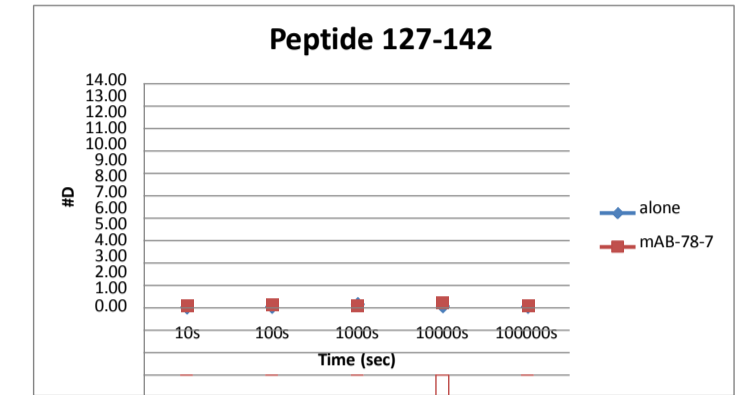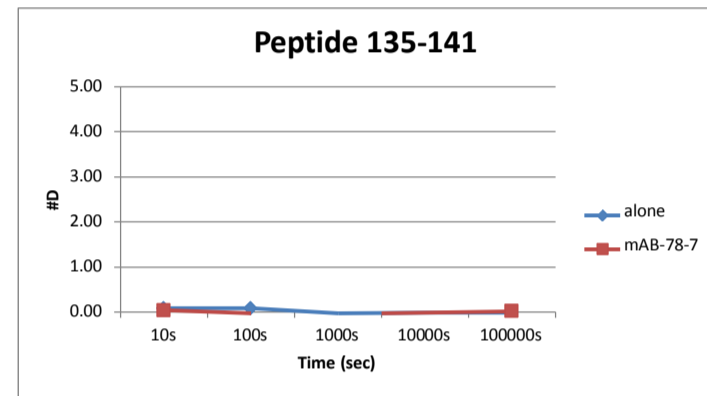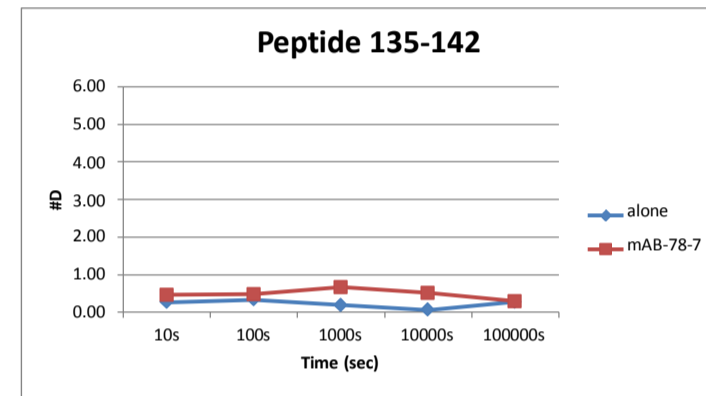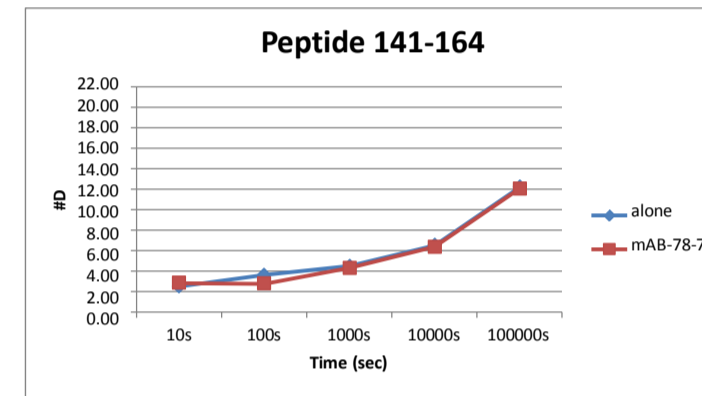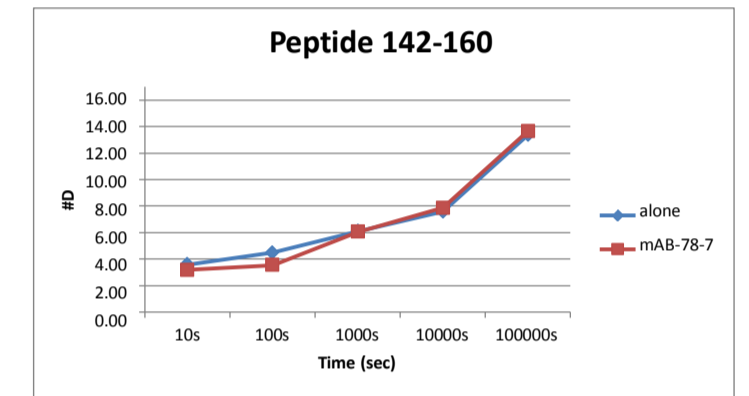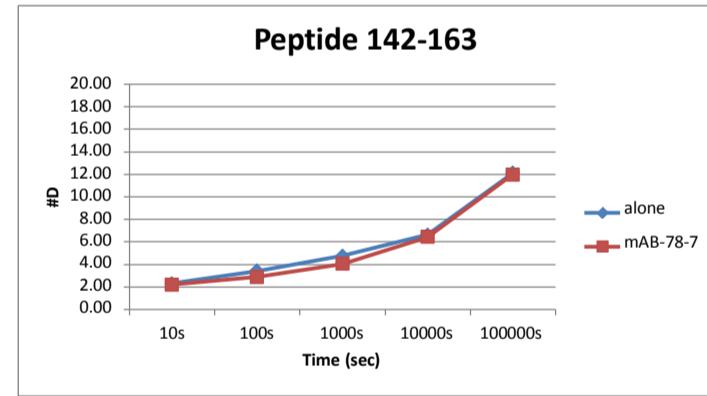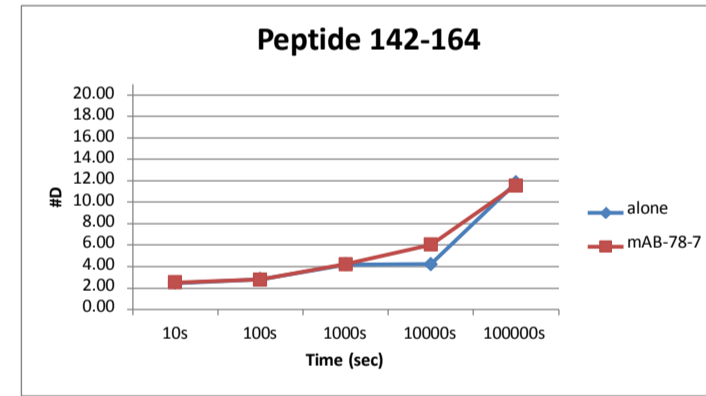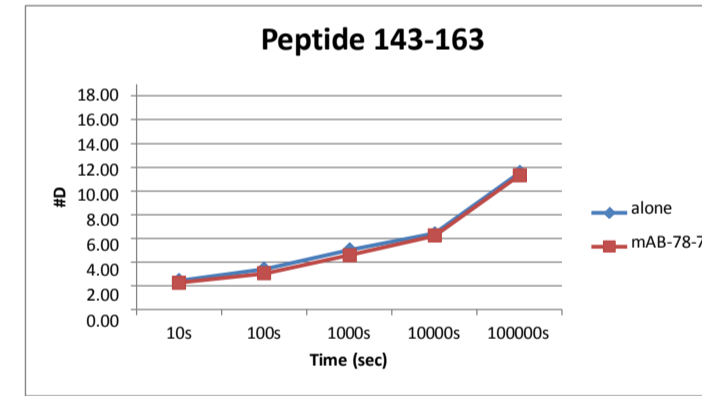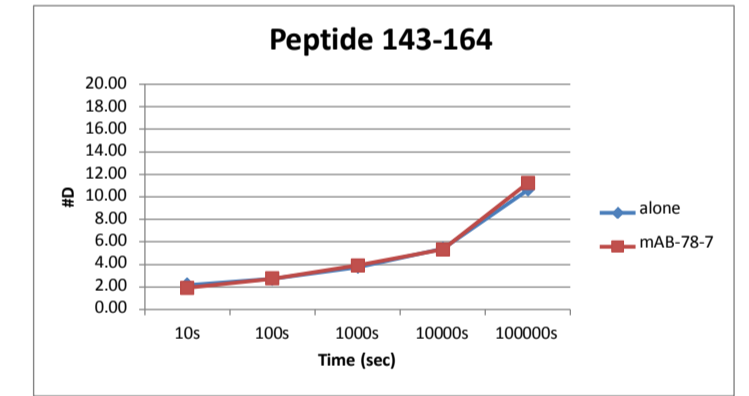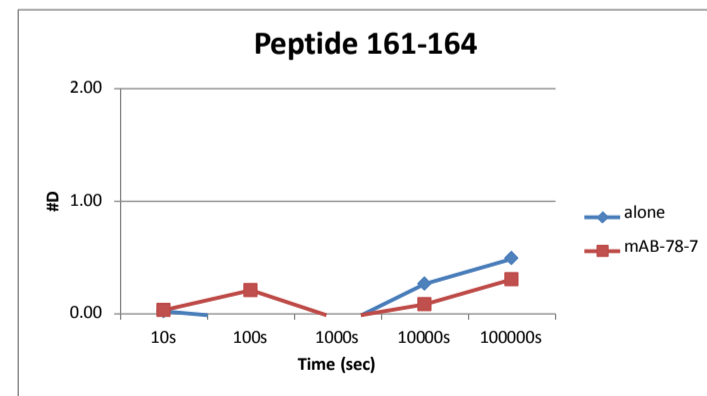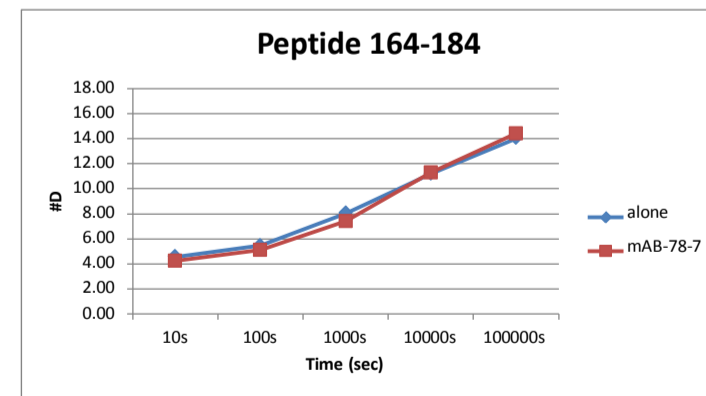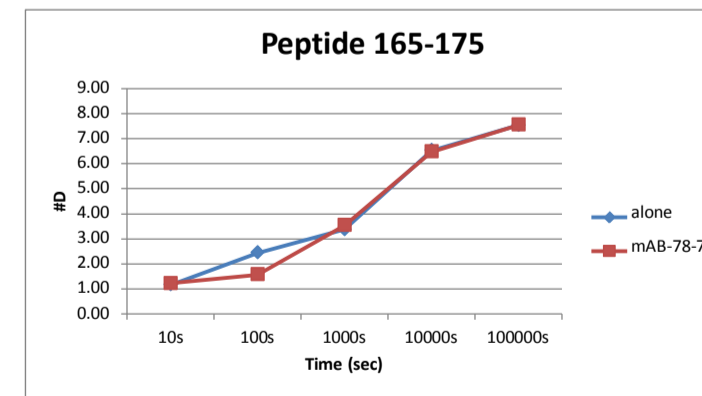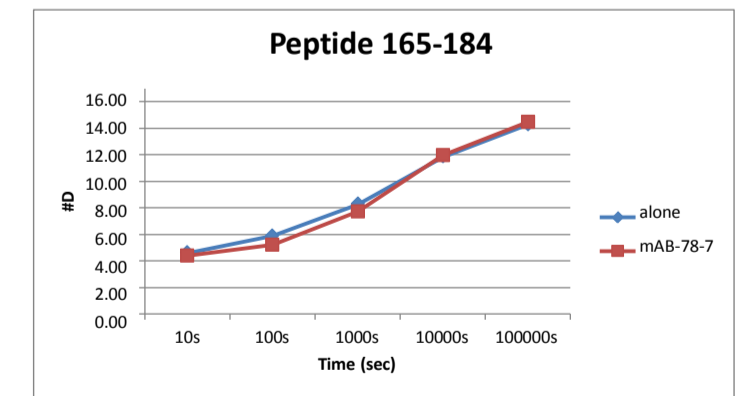





# SUPPLEMENTARY FIGURE 1 (CONTINUED)

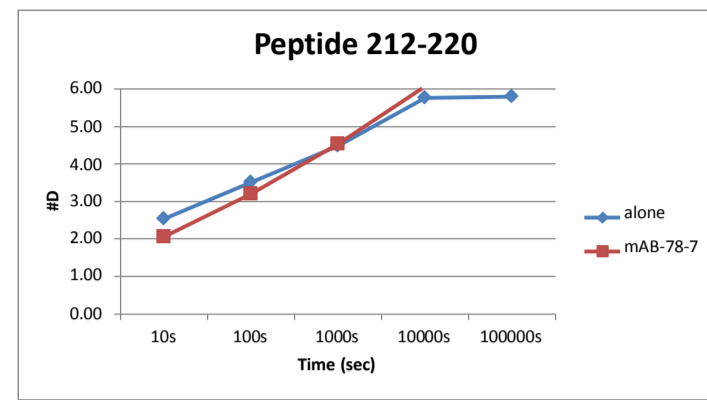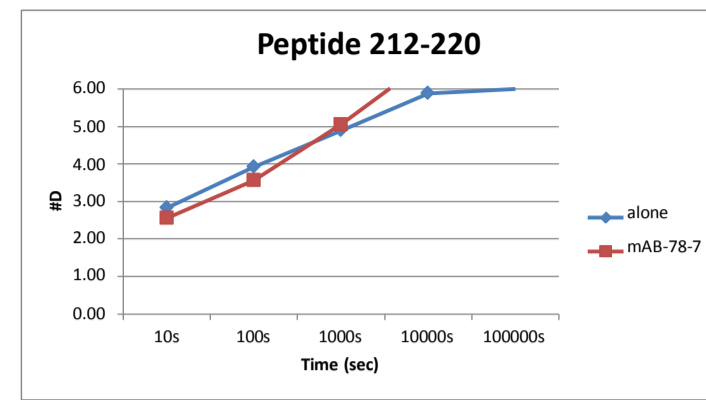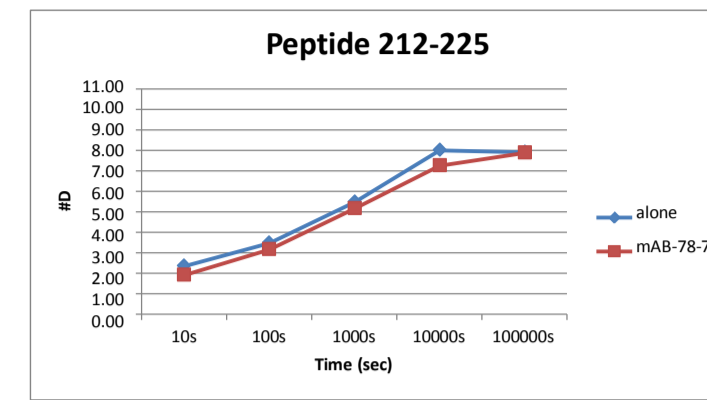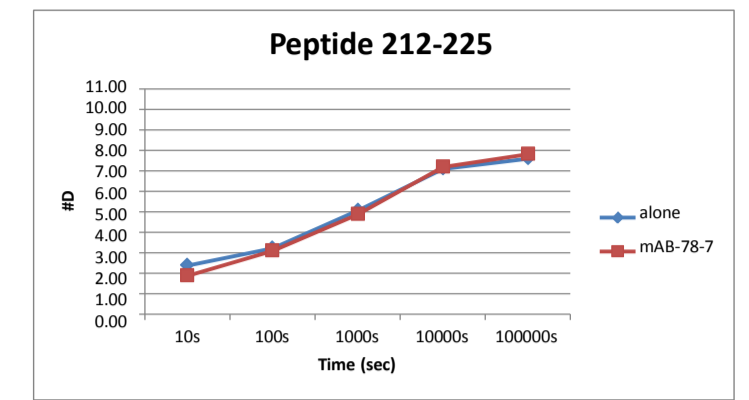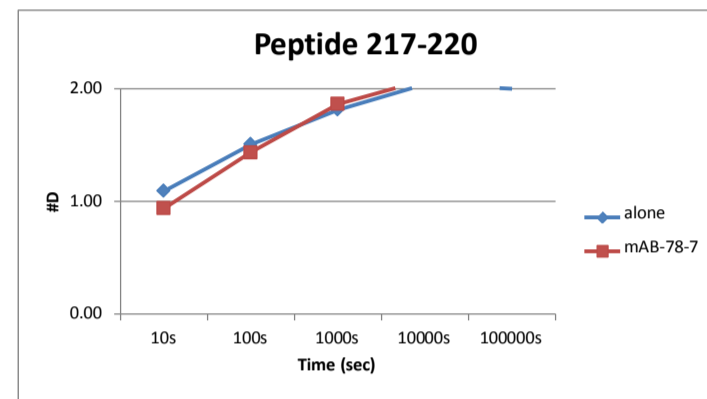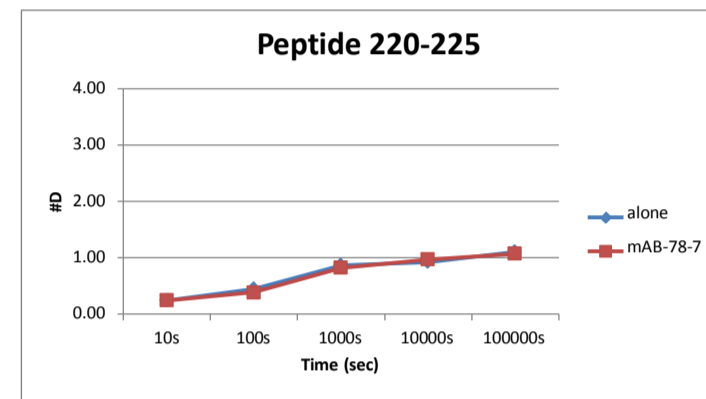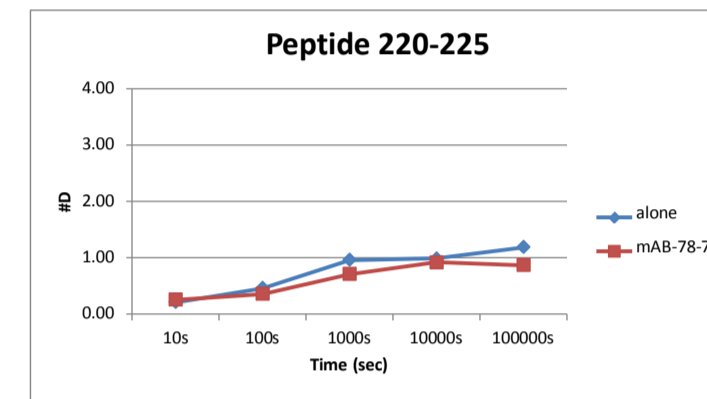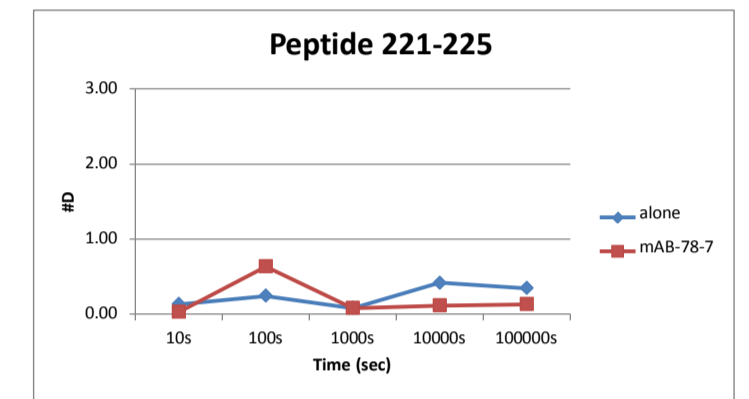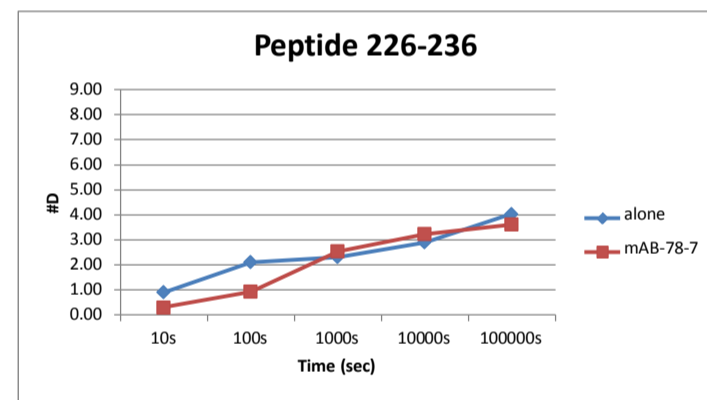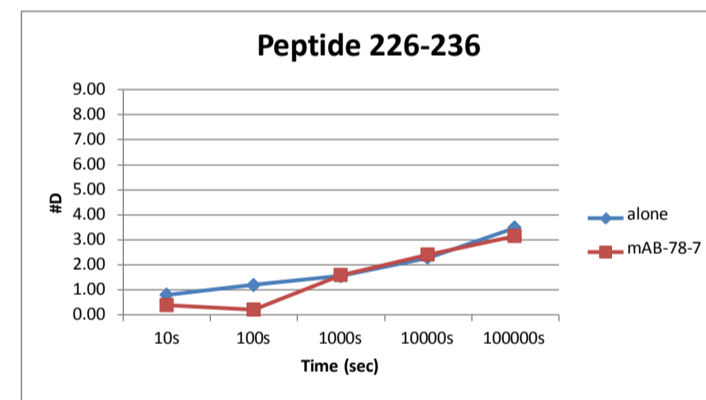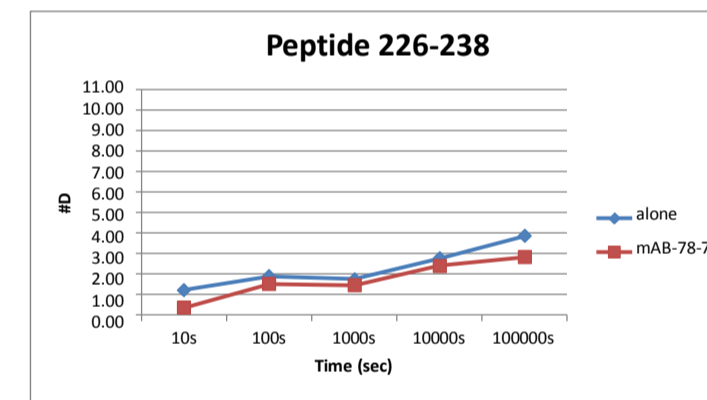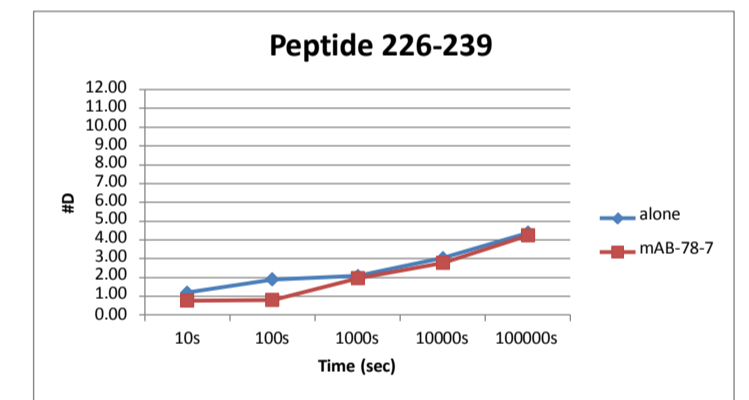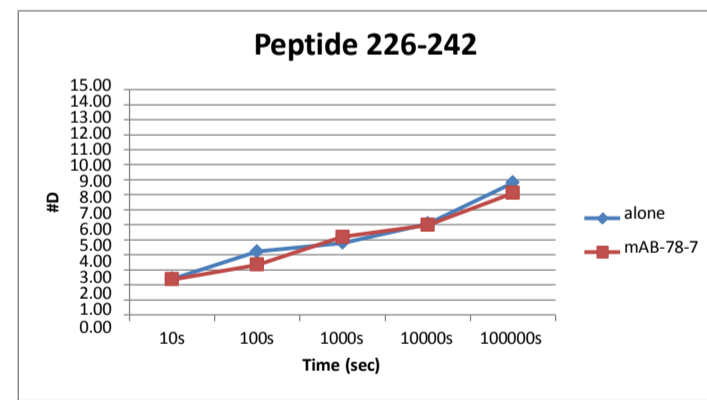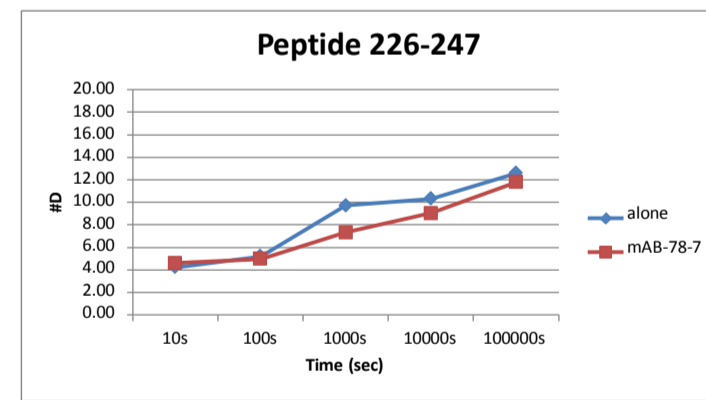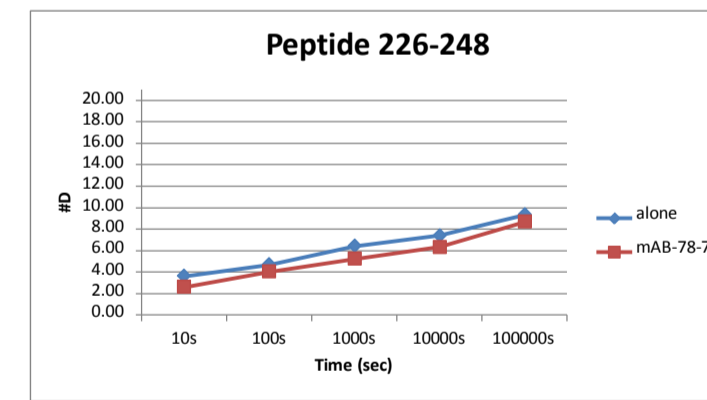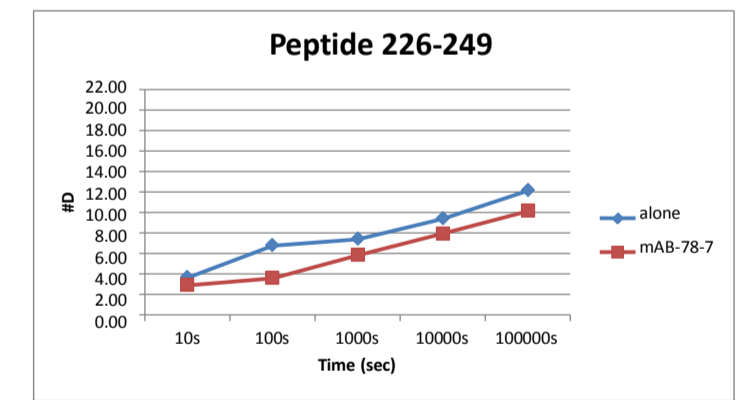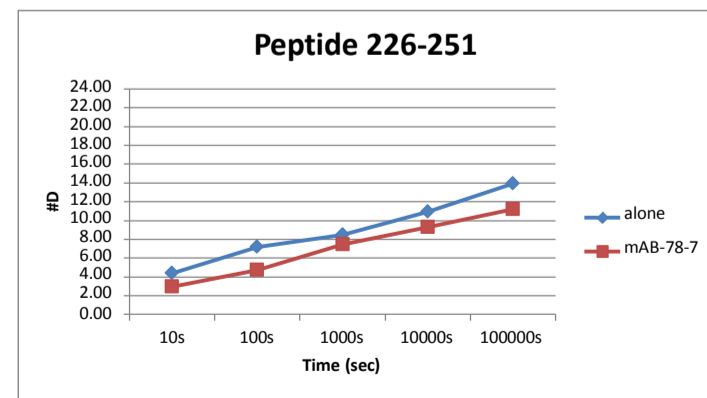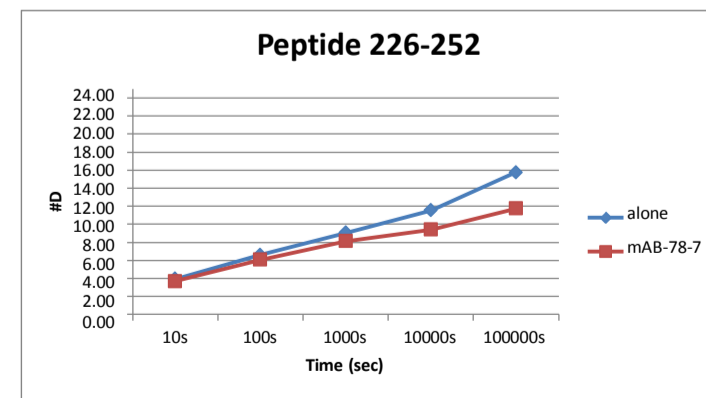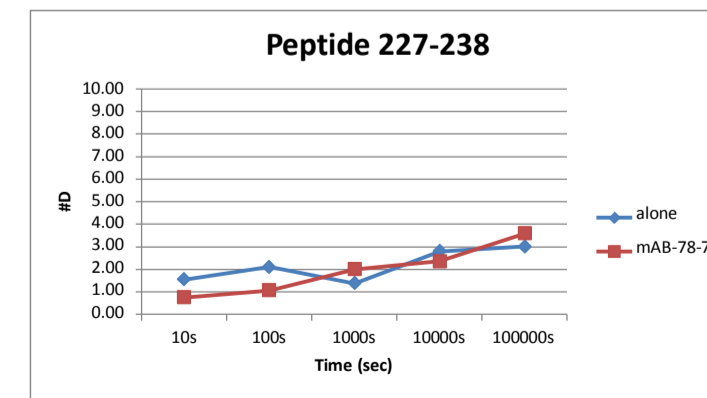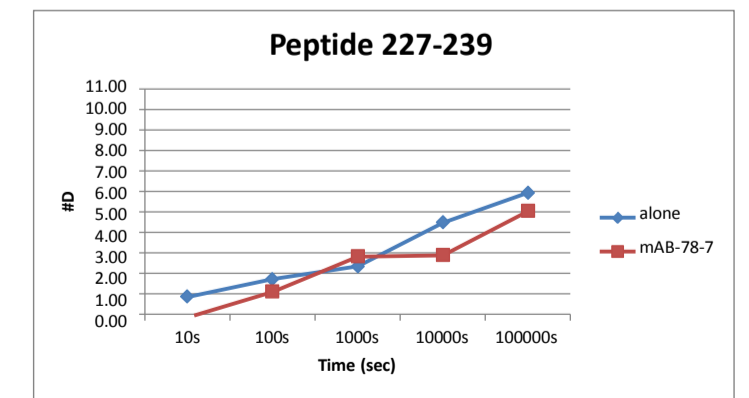





# SUPPLEMENTARY FIGURE 1 (CONTINUED)

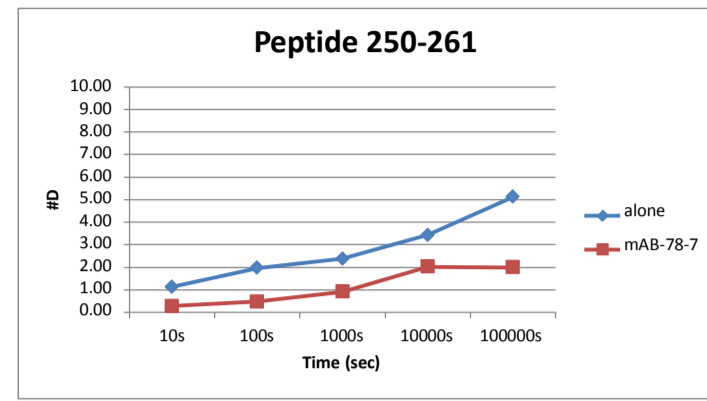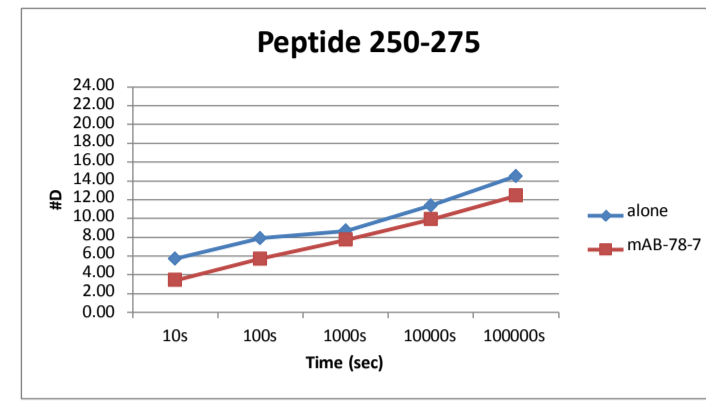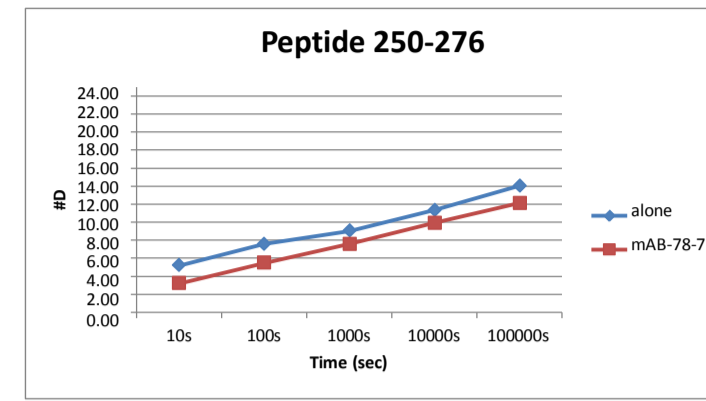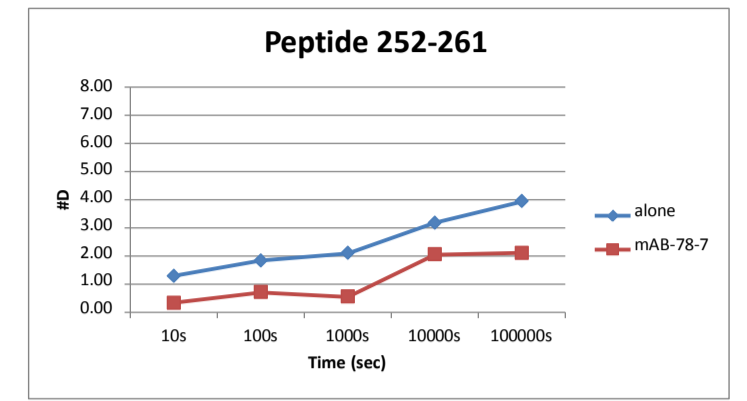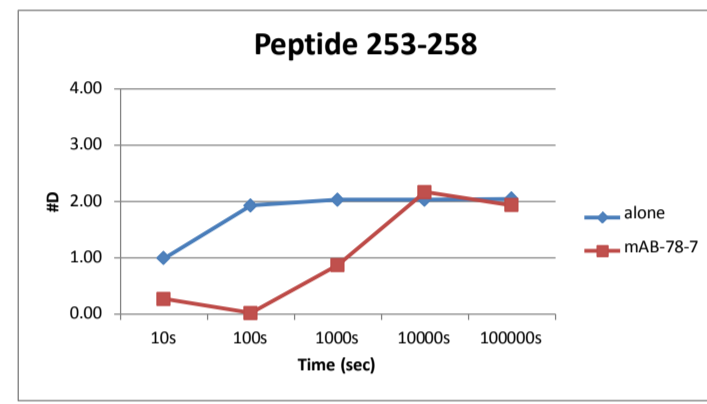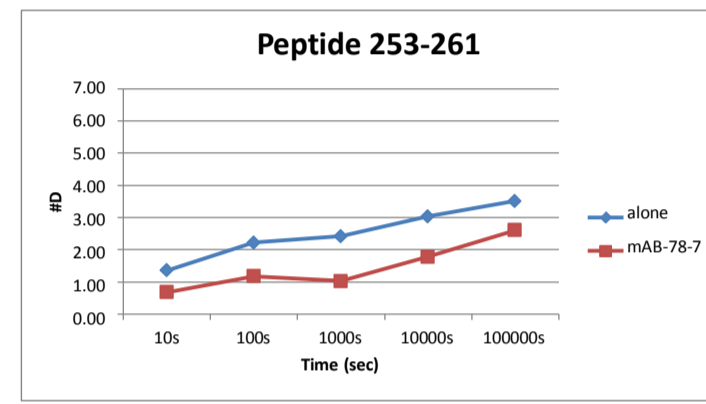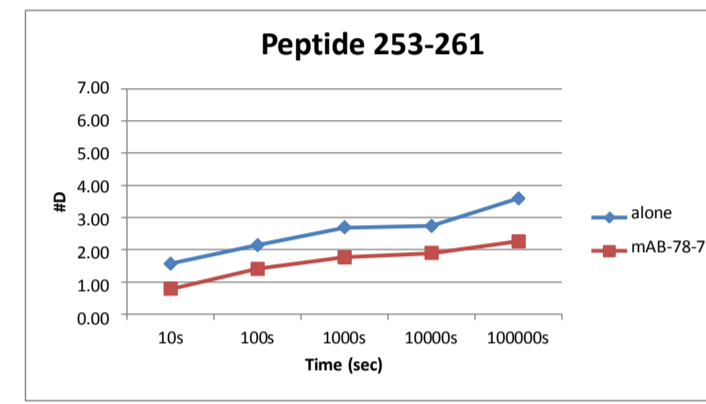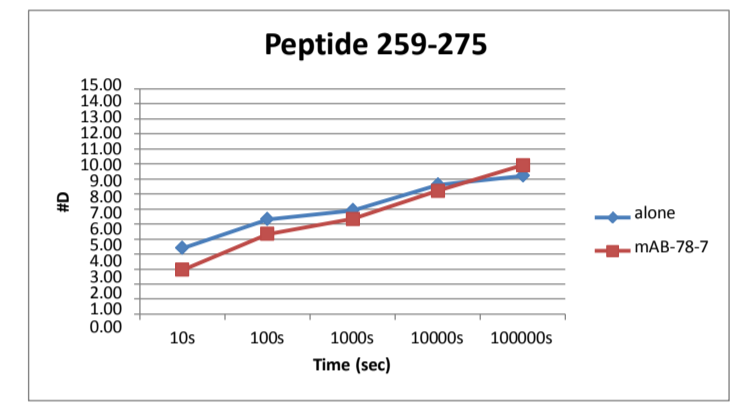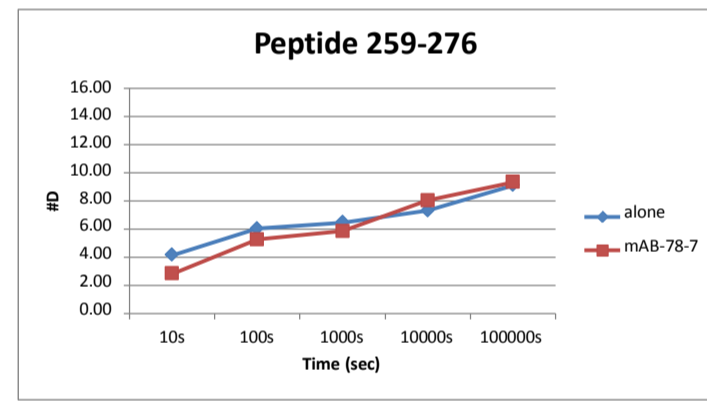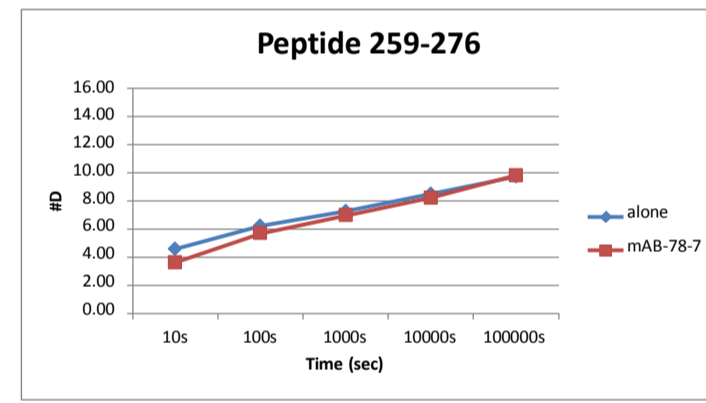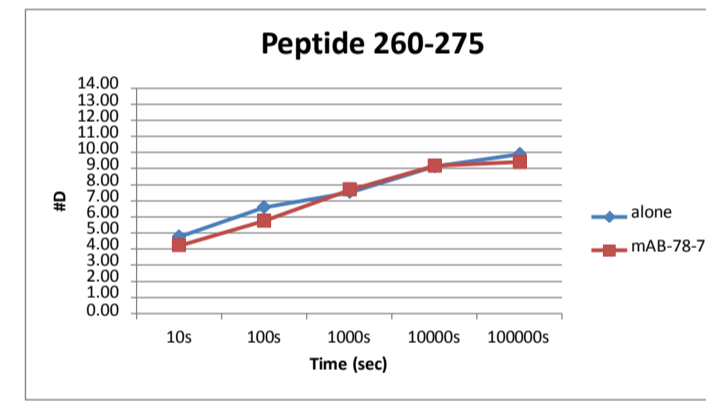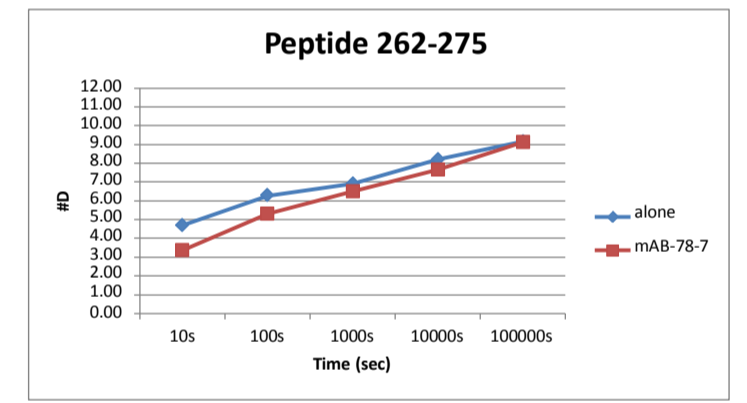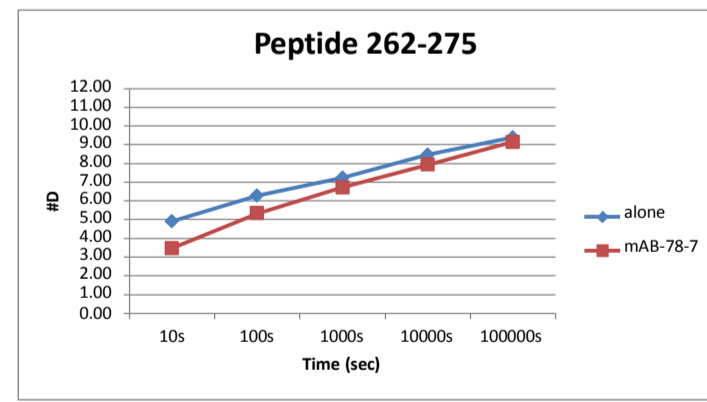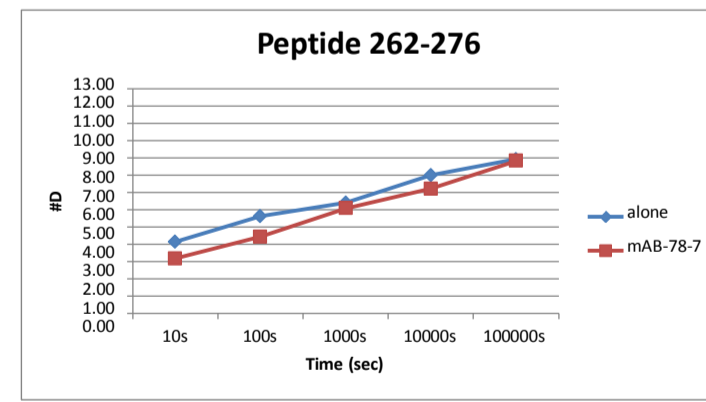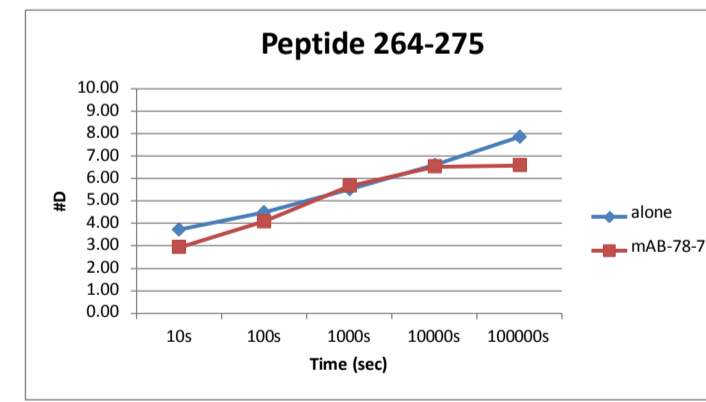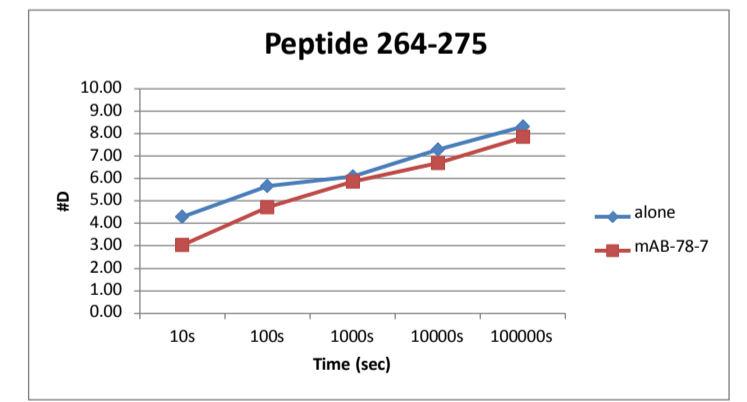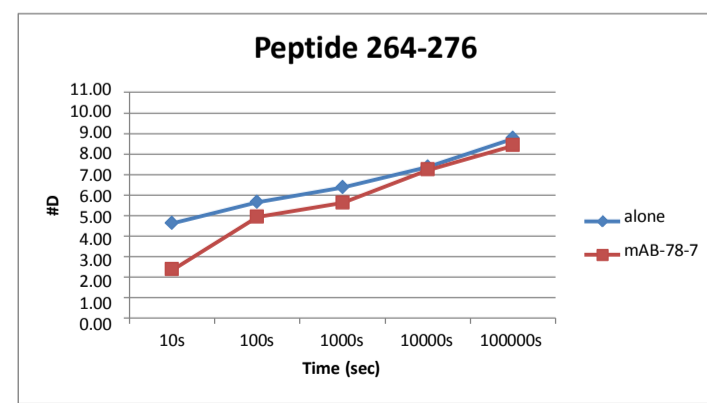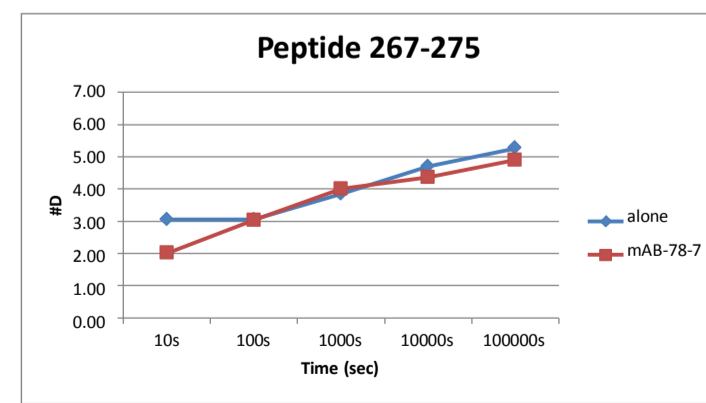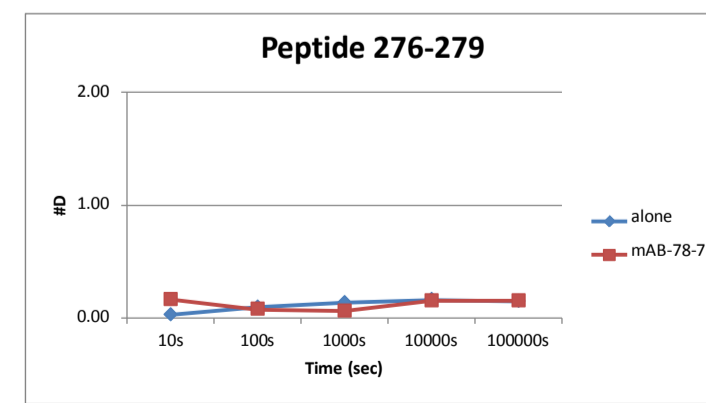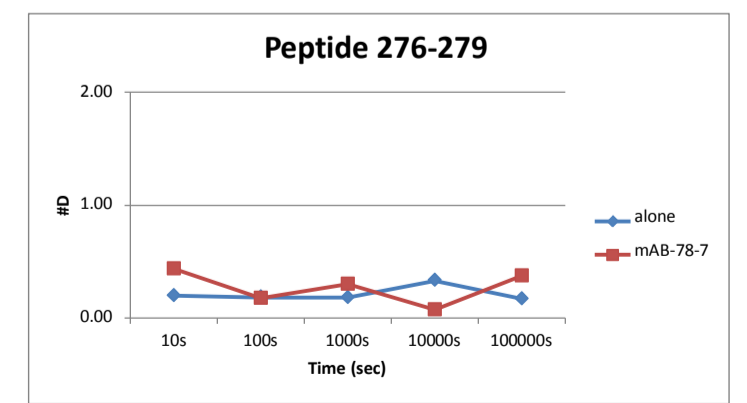

Supplement: ppat.1005908.s001.pdf [file ppat.1005908.s001.pdf]
