# Supplementary material for: High Resolution Mapping of Bactericidal Monoclonal Antibody Binding Epitopes on Staphylococcus aureus Antigen MntC
Source: PubMed Central journal article supplement (PMC5045189; doi:10.1371/journal.ppat.1005908), 2016-09-30

# SUPPLEMENTARY FIGURE 5

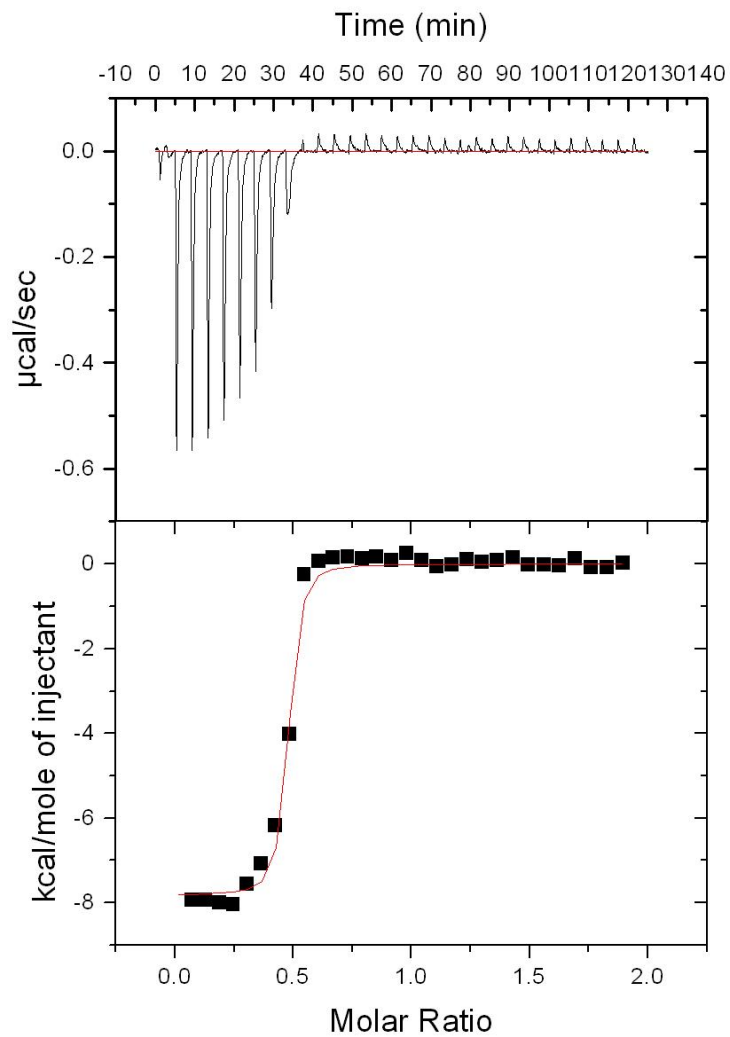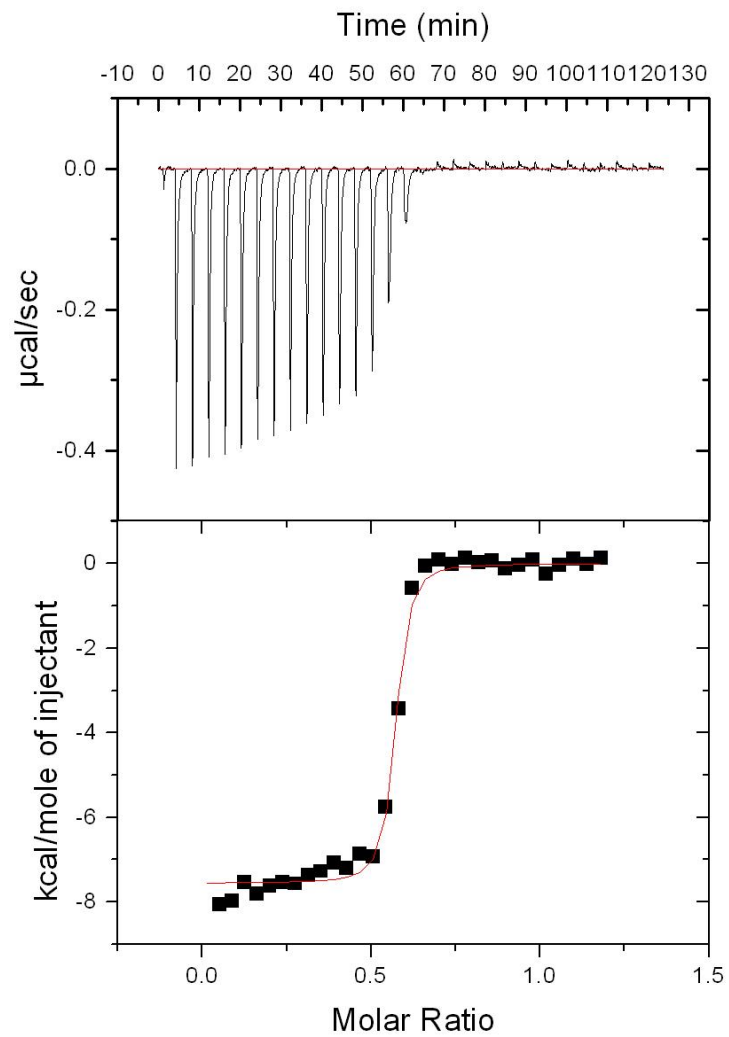

Supplement: ppat.1005908.s005.pdf [file ppat.1005908.s005.pdf]
