# Supplementary material for: High Resolution Mapping of Bactericidal Monoclonal Antibody Binding Epitopes on Staphylococcus aureus Antigen MntC
Source: PubMed Central journal article supplement (PMC5045189; doi:10.1371/journal.ppat.1005908), 2016-09-30
Supplement: ppat.1005908.s007.pdf [file ppat.1005908.s007.pdf]

## SUPPORTING TABLE 1.

### Data collection

|                             |                                     |
|-----------------------------|-------------------------------------|
| Space group                 | C2                                  |
| Unit cell dimensions (Å)    | $a = 179.71; b = 41.73; c = 108.40$ |
| Resolution range (Å)        | 48.8 – 1.8                          |
| Total number of reflections | 291,336                             |
| Unique reflections          | 43,900                              |

### Model refinement

|                                     |               |
|-------------------------------------|---------------|
| Maximum resolution (Å)              | 1.8           |
| Number of reflections (free)        | 43860 (2.236) |
| $R_{\text{work}}/R_{\text{free}}^a$ | 20.7/23.6     |
| No. of protein atoms                | 5392          |
| No. of waters                       | 197           |
| Iron ion                            | 1             |
| Other solvent                       | 1 (glycerol)  |

### Root mean square deviations

|            |       |
|------------|-------|
| Bonds (Å)  | 0.010 |
| Angles (°) | 1.23  |

<sup>a</sup> $R_{\text{work}} = \frac{\sum |F_{\text{obs}} - |F_{\text{calc}}||}{\sum |F_{\text{obs}}|}$ , where  $R_{\text{free}}$  is equivalent to  $R_{\text{work}}$  but calculated for a randomly chosen 4.82% of reflections omitted from the refinement process.
