# Supplementary material for: High Resolution Mapping of Bactericidal Monoclonal Antibody Binding Epitopes on Staphylococcus aureus Antigen MntC
Source: PubMed Central journal article supplement (PMC5045189; doi:10.1371/journal.ppat.1005908), 2016-09-30
Supplement: ppat.1005908.s008.pdf [file ppat.1005908.s008.pdf]

**Supporting Table 2. Sequences of oligonucleotides used in the study.**

|                     |                                                                                           |
|---------------------|-------------------------------------------------------------------------------------------|
| oLH553              | CAA GCT ATT GAG TTT GTT AAA AAG CAC AAA TTA AAA TTC TTA TTA GTA<br>GAA ACA AGT GTT GAT AA |
| oLH556              | GAA ACA AGT GTT GAT AAG AAA GCA ATG TTA AGT TTA TCT GAA GAA ACG<br>AAG AAA GA             |
| oLH557              | GGA AAG TTT ATC TGA AGA AAC GAT GAA AGA TAT CTT TGG TGA AGT GT                            |
| oLH569              | GAA ACA AGT GTT GAT AAG AAA GCA ATG TTA AGT TTA TCT GAA GAA ACG<br>ATG AAA GA             |
| oLH570              | TCT TTC ATC GTT TCT TCA GAT AAA CTT AAC ATT GCT TTC TTA TCA ACA<br>CTT GTT TC             |
| pLP1215 NdeI_S      | GCA TAT GGG TAC TGG TGG TAA ACA AAG C                                                     |
| pLP1215<br>BamHI_AS | CGG ATC CCC AAG GGG TTA TGC TAG TTA TTG C                                                 |
