# Supplementary material for: High Resolution Mapping of Bactericidal Monoclonal Antibody Binding Epitopes on Staphylococcus aureus Antigen MntC
Source: PubMed Central journal article supplement (PMC5045189; doi:10.1371/journal.ppat.1005908), 2016-09-30
Supplement: ppat.1005908.s009.pdf [file ppat.1005908.s009.pdf]

**Supporting Table 3. Thermodynamic parameters of Mn<sup>2+</sup> binding to the wild type MntC and MntC-pLH94.** N – interaction stoichiometry, K<sub>a</sub> – association constant, ΔH – enthalpy change upon binding, ΔS – entropy change upon binding, K<sub>d</sub> – dissociation constant

|                                      | <b>Wt-MntC</b>            | <b>MntC-pLH94</b>         |
|--------------------------------------|---------------------------|---------------------------|
| <b>N</b>                             | 0.45                      | 0.56                      |
| <b>K<sub>a</sub>, M<sup>-1</sup></b> | (2.4±0.8)×10 <sup>7</sup> | (4.5±1.1)×10 <sup>7</sup> |
| <b>ΔH, kcal/mol</b>                  | -7.8±0.1                  | -7.6±0.1                  |
| <b>ΔS,(cal/mol) °C<sup>-1</sup></b>  | -23.4                     | -28.3                     |
| <b>K<sub>d</sub>, nM</b>             | 42                        | 22                        |
